# Supplementary material for: Posthospital Fall Injuries and 30-Day Readmissions in Adults 65 Years and Older
Source: PubMed Central journal article supplement (PMC6632136; doi:10.1001/jamanetworkopen.2019.4276), 2019-05-24
Supplement: jamanetwopen-2-e194276-s001.pdf [file jamanetwopen-2-e194276-s001.pdf]

## Supplementary Online Content

Hoffman GJ, Liu H, Alexander NB, Tinetti M, Braun TM, Min LC. Posthospital fall injuries and 30-day readmissions in adults 65 years and older. *JAMA Netw Open*. 2019;2(5):e194276. doi:10.1001/jamanetworkopen.2019.4276

**eTable 1.** Exclusion Criteria for Eligible Index Cohort, Overall and by Clinical Condition Cohort

**eTable 2.** Leading Clinical Classification Software (CCS) Categories for Index Fallers and Non-Fallers, 2013-2014

**eTable 3.** Clinical Characteristics of Older ( $\geq 65$ ) Medicare Beneficiaries Overall and by Fall Injury Status for U.S. Hospital Discharges, 2013-2014

**eTable 4.** Unplanned 30-Day All-Cause Readmission Prevalence Among Older ( $\geq 65$ ) Medicare Beneficiaries by Acute Geriatric Cohort, Across Five Clinical Index Discharge Cohorts, Overall and by Fall Injury Status, 2013-2014

**eTable 5.** Percentage of 30-Day Unplanned All-Cause Readmissions of Older ( $\geq 65$ ) Medicare Beneficiaries Overall and Among FRI and Cognitive Impairment Index Cohorts, by Index Clinical Condition, 2013-2014

This supplementary material has been provided by the authors to give readers additional information about their work.

eTable 1. Exclusion Criteria for Eligible Index Cohort, Overall and by Clinical Condition Cohort

|                                                                            | <i>n</i>         | Percent removed (%) |
|----------------------------------------------------------------------------|------------------|---------------------|
| 1. Medicare population ≥65 years                                           | 10,111,157       |                     |
| 2. Exclude admissions with in-hospital death                               | 387,949          | 3.8                 |
| 3. Exclude admissions transferred to another acute care facility           | 183,576          | 1.8                 |
| 4. Exclude admissions with less than 30 days follow-up from discharge date | 821,527          | 8.1                 |
| 5. Exclude admissions discharged against medical advice                    | 45,159           | 0.5                 |
| 6. Exclude admissions for primary psychiatric diagnoses                    | 79,862           | 0.8                 |
| 7. Exclude admissions for rehabilitation                                   | 22,053           | 0.2                 |
| 8. Exclude admissions of cancer                                            | 187,508          | 1.9                 |
| <b>Final Cohort</b>                                                        | <b>8,382,074</b> | <b>17.1</b>         |
|                                                                            |                  |                     |
|                                                                            | <i>n</i>         | Percent total (%)   |
| Identify admissions for <b>Medicine</b> (Cohort 1)                         | 3,561,772        | 42.5                |
| Identify admissions for a major <b>Surgery</b> (Cohort 2)                  | 2,070,888        | 24.7                |
| Identify admissions for <b>Cardiorespiratory</b> (Cohort 3)                | 1,344,038        | 16.0                |
| Identify admissions for <b>Cardiovascular</b> (Cohort 4)                   | 887,879          | 10.6                |
| Identify admissions for <b>Neurology</b> (Cohort 5)                        | 517,497          | 6.2                 |

eTable 2. Leading Clinical Classification Software (CCS) Categories for Index Fallers and Non-Fallers, 2013-2014

| <b>Top 10 CCS in Medicine<sup>a</sup></b>          |                                                                                |  |                    |                                                                                |  |
|----------------------------------------------------|--------------------------------------------------------------------------------|--|--------------------|--------------------------------------------------------------------------------|--|
| <b>Fallers</b>                                     |                                                                                |  | <b>Non-Fallers</b> |                                                                                |  |
| N = 306,318                                        |                                                                                |  | N = 3,255,454      |                                                                                |  |
| CCS                                                | Category Name                                                                  |  | CCS                | Category Name                                                                  |  |
| 231                                                | Other fractures                                                                |  | 2                  | Septicemia (except in labor)                                                   |  |
| 2                                                  | Septicemia (except in labor)                                                   |  | 159                | Urinary tract infections                                                       |  |
| 159                                                | Urinary tract infections                                                       |  | 157                | Acute and unspecified renal failure                                            |  |
| 245                                                | Syncope                                                                        |  | 153                | Gastrointestinal hemorrhage                                                    |  |
| 229                                                | Fracture of upper limb                                                         |  | 55                 | Fluid and electrolyte disorders                                                |  |
| 157                                                | Acute and unspecified renal failure                                            |  | 197                | Skin and subcutaneous tissue infections                                        |  |
| 239                                                | Superficial injury; contusion                                                  |  | 237                | Complication of device; implant or graft                                       |  |
| 197                                                | Skin and subcutaneous tissue infections                                        |  | 145                | Intestinal obstruction without hernia                                          |  |
| 230                                                | Fracture of lower limb                                                         |  | 146                | Diverticulosis and diverticulitis                                              |  |
| 226                                                | Fracture of neck of femur (hip)                                                |  | 238                | Complications of surgical procedures or medical care                           |  |
| <b>Top 10 CCS in Cardiorespiratory<sup>a</sup></b> |                                                                                |  |                    |                                                                                |  |
| <b>Fallers</b>                                     |                                                                                |  | <b>Non-Fallers</b> |                                                                                |  |
| N = 35,298                                         |                                                                                |  | N = 1,308,740      |                                                                                |  |
| CCS                                                | Category Name                                                                  |  | CCS                | Category Name                                                                  |  |
| 122                                                | Pneumonia (except that caused by tuberculosis or sexually transmitted disease) |  | 108                | Congestive heart failure; nonhypertensive                                      |  |
| 108                                                | Congestive heart failure; nonhypertensive                                      |  | 122                | Pneumonia (except that caused by tuberculosis or sexually transmitted disease) |  |
| 127                                                | Chronic obstructive pulmonary disease and bronchiectasis                       |  | 127                | Chronic obstructive pulmonary disease and bronchiectasis                       |  |
| 131                                                | Respiratory failure; insufficiency; arrest (adult)                             |  | 131                | Respiratory failure; insufficiency; arrest (adult)                             |  |
| 103                                                | Pulmonary heart disease                                                        |  | 103                | Pulmonary heart disease                                                        |  |

|                                                 |                                                                                                                    |  |                    |                                                                                                                       |
|-------------------------------------------------|--------------------------------------------------------------------------------------------------------------------|--|--------------------|-----------------------------------------------------------------------------------------------------------------------|
| 128                                             | Asthma                                                                                                             |  | 128                | Asthma                                                                                                                |
| 125                                             | Acute bronchitis                                                                                                   |  | 125                | Acute bronchitis                                                                                                      |
|                                                 |                                                                                                                    |  | 56                 | Cystic fibrosis                                                                                                       |
| <b>Top 10 CCS in Cardiovascular<sup>a</sup></b> |                                                                                                                    |  |                    |                                                                                                                       |
| <b>Fallers</b>                                  |                                                                                                                    |  | <b>Non-Fallers</b> |                                                                                                                       |
| N = 31,656                                      |                                                                                                                    |  | N = 856,223        |                                                                                                                       |
| CC<br>S                                         | Category Name                                                                                                      |  | CCS                | Category Name                                                                                                         |
| 106                                             | Cardiac dysrhythmias                                                                                               |  |                    | 106 Cardiac dysrhythmias                                                                                              |
| 117                                             | Other circulatory disease                                                                                          |  |                    | 100 Acute myocardial infarction                                                                                       |
| 100                                             | Acute myocardial infarction                                                                                        |  |                    | 101 Coronary atherosclerosis and other heart disease                                                                  |
| 105                                             | Conduction disorders                                                                                               |  |                    | 102 Nonspecific chest pain                                                                                            |
| 102                                             | Nonspecific chest pain                                                                                             |  |                    | 117 Other circulatory disease                                                                                         |
| 101                                             | Coronary atherosclerosis and other heart disease                                                                   |  |                    | 114 Peripheral and visceral atherosclerosis                                                                           |
| 114                                             | Peripheral and visceral atherosclerosis                                                                            |  |                    | 105 Conduction disorders                                                                                              |
| 96                                              | Heart valve disorders                                                                                              |  |                    | 97 Peri-; endo-; and myocarditis; cardiomyopathy (except that caused by tuberculosis or sexually transmitted disease) |
| 97                                              | Peri-; endo-; and myocarditis; cardiomyopathy (except that caused by tuberculosis or sexually transmitted disease) |  |                    | 96 Heart valve disorders                                                                                              |
| 107                                             | Cardiac arrest and ventricular fibrillation                                                                        |  |                    | 115 Aortic; peripheral; and visceral artery aneurysms                                                                 |
| <b>Top 10 CCS in Neurology<sup>a</sup></b>      |                                                                                                                    |  |                    |                                                                                                                       |
| <b>Fallers</b>                                  |                                                                                                                    |  | <b>Non-Fallers</b> |                                                                                                                       |
| N = 75,917                                      |                                                                                                                    |  | N = 441,580        |                                                                                                                       |
| CC<br>S                                         | Category Name                                                                                                      |  | CCS                | Category Name                                                                                                         |
| 233                                             | Intracranial injury                                                                                                |  |                    | 109 Acute cerebrovascular disease                                                                                     |
| 109                                             | Acute cerebrovascular disease                                                                                      |  |                    | 112 Transient cerebral ischemia                                                                                       |

|                                           |                                                                                 |  |                    |                                                             |
|-------------------------------------------|---------------------------------------------------------------------------------|--|--------------------|-------------------------------------------------------------|
| 95                                        | Other nervous system disorders                                                  |  | 95                 | Other nervous system disorders                              |
| 83                                        | Epilepsy; convulsions                                                           |  | 83                 | Epilepsy; convulsions                                       |
| 112                                       | Transient cerebral ischemia                                                     |  | 81                 | Other hereditary and degenerative nervous system conditions |
| 81                                        | Other hereditary and degenerative nervous system conditions                     |  | 113                | Late effects of cerebrovascular disease                     |
| 227                                       | Spinal cord injury                                                              |  | 110                | Occlusion or stenosis of precerebral arteries               |
| 79                                        | Parkinson`s disease                                                             |  | 85                 | Coma; stupor; and brain damage                              |
| 113                                       | Late effects of cerebrovascular disease                                         |  | 111                | Other and ill-defined cerebrovascular disease               |
| 85                                        | Coma; stupor; and brain damage                                                  |  | 79                 | Parkinson`s disease                                         |
| <b>Top 10 CCS in Surgical<sup>b</sup></b> |                                                                                 |  |                    |                                                             |
| <b>Fallers</b>                            |                                                                                 |  | <b>Non-Fallers</b> |                                                             |
| N = 297,208                               |                                                                                 |  | N = 1,773,680      |                                                             |
| CC<br>S                                   | Category Name                                                                   |  | CCS                | Category Name                                               |
| 146                                       | Treatment; fracture or dislocation of hip and femur                             |  | 152                | Arthroplasty knee                                           |
| 222                                       | Blood transfusion                                                               |  | 222                | Blood transfusion                                           |
| 153                                       | Hip replacement; total and partial                                              |  | 153                | Hip replacement; total and partial                          |
| 147                                       | Treatment; fracture or dislocation of lower extremity (other than hip or femur) |  | 231                | Other therapeutic procedures                                |
| 148                                       | Other fracture and dislocation procedure                                        |  | 54                 | Other vascular catheterization; not heart                   |
| 161                                       | Other OR therapeutic procedures on bone                                         |  | 61                 | Other OR procedures on vessels other than head and neck     |
| 145                                       | Treatment; fracture or dislocation of radius and ulna                           |  | 3                  | Laminectomy; excision intervertebral disc                   |

eTable 3. Clinical Characteristics of Older ( $\geq 65$ ) Medicare Beneficiaries Overall and by Fall Injury Status for U.S. Hospital Discharges, 2013-2014

|                                                                                     | Overall              | Fallers            | Non-Fallers          | <i>p-val</i> * |
|-------------------------------------------------------------------------------------|----------------------|--------------------|----------------------|----------------|
|                                                                                     | <i>n</i> = 8,382,074 | <i>n</i> = 746,397 | <i>n</i> = 7,635,677 |                |
| Cohort (%)                                                                          |                      |                    |                      |                |
| Medicine ( <i>n</i> = 3,561,772)                                                    | 42.5                 | 41.0               | 42.6                 | <.001          |
| Cardiorespiratory ( <i>n</i> = 1,344,038)                                           | 16.0                 | 4.7                | 17.1                 |                |
| Cardiovascular ( <i>n</i> = 887,879)                                                | 10.6                 | 4.2                | 11.2                 |                |
| Neurology ( <i>n</i> = 517,497)                                                     | 6.2                  | 10.2               | 5.8                  |                |
| Surgical ( <i>n</i> = 2,070,888)                                                    | 24.7                 | 39.8               | 23.2                 |                |
| * Compares fallers and non-fallers. Chi-square test is used to compare proportions. |                      |                    |                      |                |
| <i>Note:</i> Falls were assessed at the index discharge.                            |                      |                    |                      |                |

eTable 4. Unplanned 30-Day All-Cause Readmission Prevalence Among Older (≥65) Medicare Beneficiaries by Acute Geriatric Cohort, Across Five Clinical Index Discharge Cohorts, Overall and by Fall Injury Status, 2013-2014

|                                           | Overall                 | Index FRI<br>Acute Geriatric Cohort |                         | <i>p-val</i> | Index Cognitive Impairment<br>Acute Geriatric Cohort |                     | <i>p-val</i> |
|-------------------------------------------|-------------------------|-------------------------------------|-------------------------|--------------|------------------------------------------------------|---------------------|--------------|
|                                           |                         | Yes                                 | No                      |              | Yes                                                  | No                  |              |
|                                           | <i>n</i> =<br>8,382,074 | <i>n</i> =<br>746,397               | <i>n</i> =<br>7,635,677 |              | <i>n</i> =<br>1,367,759                              | <i>n</i> =7,014,315 |              |
| By Cohort (%)                             |                         |                                     |                         |              |                                                      |                     |              |
| Medicine ( <i>n</i> = 3,561,772)          | 16.0                    | 13.4                                | 16.3                    | <.001        | 16.1                                                 | 16.0                | 0.10         |
| Cardiorespiratory ( <i>n</i> = 1,344,038) | 18.5                    | 19.0                                | 18.5                    | 0.019        | 18.1                                                 | 18.6                | <.001        |
| Cardiovascular ( <i>n</i> = 887,879)      | 12.7                    | 13.8                                | 12.7                    | <.001        | 15.5                                                 | 12.3                | <.001        |
| Neurology ( <i>n</i> = 517,497)           | 12.3                    | 13.4                                | 12.1                    | <.001        | 13.4                                                 | 12.0                | <.001        |
| Surgical ( <i>n</i> = 2,070,888)          | 10.2                    | 11.4                                | 9.9                     | <.001        | 15.2                                                 | 9.7                 | <.001        |

eTable 5. Percentage of 30-Day Unplanned All-Cause Readmissions of Older ( $\geq 65$ ) Medicare Beneficiaries Overall and among FRI and Cognitive Impairment Index Cohorts, by Index Clinical Condition, 2013-2014

|                                          | <b>Medicine</b>                                          | <b>Surgery</b>                                          | <b>Cardio-respiratory</b>                                | <b>Cardio-vascular</b>                                  | <b>Neurology</b>                                        |
|------------------------------------------|----------------------------------------------------------|---------------------------------------------------------|----------------------------------------------------------|---------------------------------------------------------|---------------------------------------------------------|
|                                          | % (Rank)                                                 | % (Rank)                                                | % (Rank)                                                 | % (Rank)                                                | % (Rank)                                                |
| Overall <sup>a</sup>                     | 5.5 ( <b>3<sup>rd</sup></b> )<br>N = 31,161<br>(570,530) | 4.2 ( <b>4<sup>th</sup></b> )<br>N = 8,806<br>(210,146) | 4.4 ( <b>7<sup>th</sup></b> )<br>N = 10,957<br>(248,966) | 4.4 ( <b>4<sup>th</sup></b> )<br>N = 4,984<br>(112,685) | 7.9 ( <b>3<sup>rd</sup></b> )<br>N = 5,046<br>(63,635)  |
| FRI Index Cohort <sup>b</sup>            | 12.1 ( <b>1<sup>st</sup></b> )<br>N = 4,962<br>(41,111)  | 7.2 ( <b>2<sup>nd</sup></b> )<br>N = 2,429<br>(33,913)  | 8.6 ( <b>3<sup>rd</sup></b> )<br>N = 576 (6,708)         | 9.6 ( <b>2<sup>nd</sup></b> )<br>N = 417 (4,368)        | 15.0 ( <b>1<sup>st</sup></b> )<br>N = 1,531<br>(10,201) |
| Cognitive Impairment Cohort <sup>c</sup> | 7.2 ( <b>2<sup>nd</sup></b> )<br>N = 9,049<br>(126,510)  | 6.3 ( <b>2<sup>nd</sup></b> )<br>N = 1,583<br>(25,189)  | 5.8 ( <b>6<sup>th</sup></b> )<br>N = 1,987<br>(34,217)   | 6.7 ( <b>4<sup>th</sup></b> )<br>N = 1,029<br>(15,421)  | 9.5 ( <b>2<sup>nd</sup></b> )<br>N = 1,614<br>(17,014)  |

<sup>a</sup> n=8,382,074; <sup>b</sup> n=746,397; <sup>c</sup> n=1,367,759
